# Supplementary material
Source: Springer Nature journal article supplement (https://www.springermedizin.de/resource/supplementary/12986_2007_130_MOESM3_ESM.pdf/25655500)

**Changes in adiponectin (mg/L)**

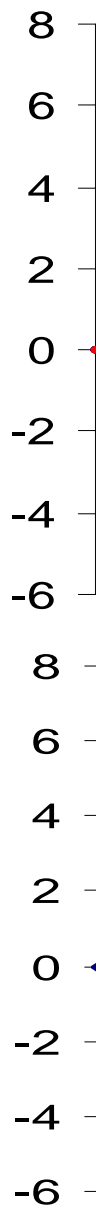

**EGG**

**SUB**

**Baseline**

**12 wk**

Supplement: MOESM3 [file 25655500]
